# Supplementary material for: Immunogenicity and reactogenicity against the SARS-CoV-2 variants following heterologous primary series involving CoronaVac and ChAdOx1 and BNT162b2 plus heterologous BNT162b2 booster vaccination: An open-label randomized study in healthy Thai adults
Source: bioRxiv or medRxiv preprint supplement (doi:10.1101/2022.03.03.22271601), 2022-03-06

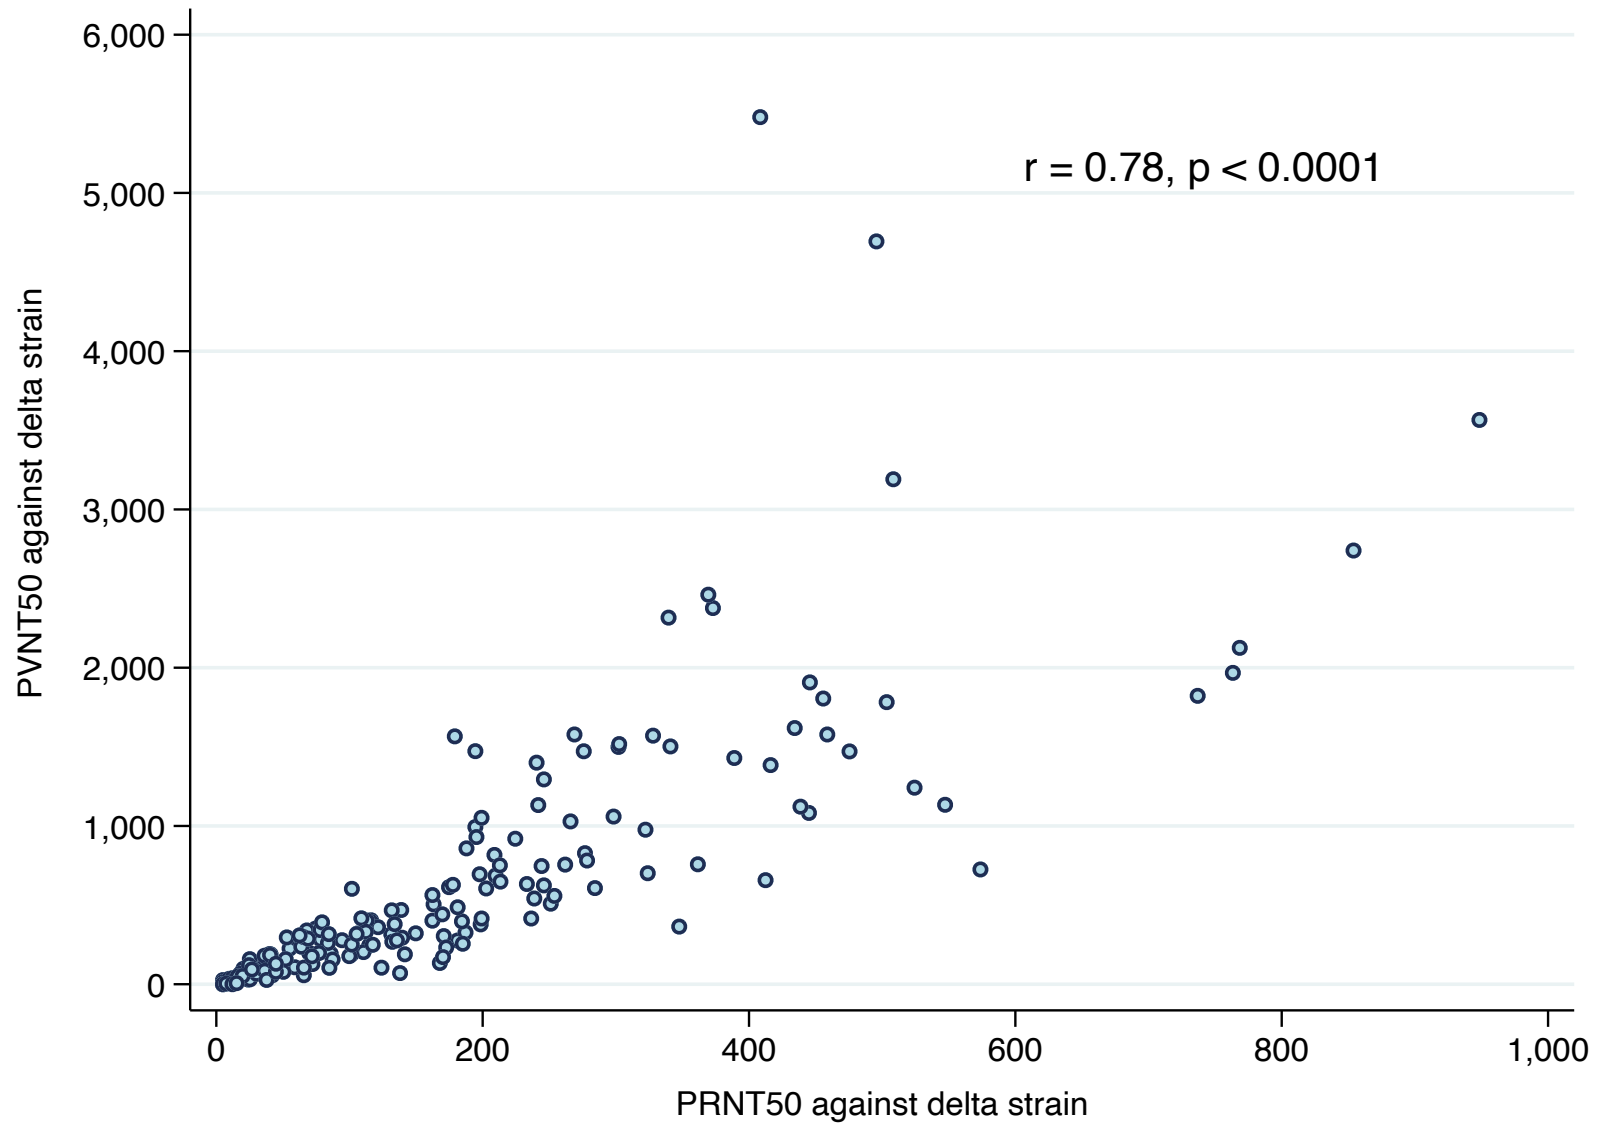

Supplement: Supplementary file [file media-2.pdf]
